# Supplementary material for: Effectiveness of post-campaign, door-to-door, hang-up, and communication interventions to increase long-lasting, insecticidal bed net utilization in Togo (2011–2012): a cluster randomized, control trial
Source: PubMed Central journal article supplement (PMC4110632; doi:10.1186/1475-2875-13-260), 2014-07-09
Supplement: 1475-2875-13-260-S1.pdf [file 1475-2875-13-260-S1.pdf]

Additional file 1 – “Wealth” index development using multiple correspondence analysis and impact of socioeconomic status on ITN access and use.

## Background

It is our intention to explore the potential effect of household socioeconomic status on bednet utilization and malaria-related knowledge and practices. Given the difficulty in measuring household income or consumption expenditure due to recall bias, seasonality and data collection burden, asset-based measures are often used as a proxy for longer-term household economic status (Vyas and Kumaranayake, 2006). Following collection of asset variables at the household level, it is necessary to aggregate this data in some way since most individual asset variables are not sufficient to differentiate household socioeconomic status (Vyas and Kumaranayake, 2006). Filmer and Pritchett (2001) propose that the use of Principal Components Analysis (PCA) is pragmatic, avoiding the problems associated with using equal weights for all variables in the index or attempting to estimate the price or value of each asset. However, PCA was designed for use with continuous, normally-distributed variables and therefore its application to the categorical variables in a wealth index is considered by some to be inappropriate (Booyesen et al., 2008; Howe et al., 2008). Multiple Correspondence Analysis (MCA) is analogous to PCA but is designed for use with discrete data. Based on work by Howe et al. (2008), comparison of indices generated by PCA and MCA showed a high level of agreement.

## Methods

Vyas and Kumaranayake (2006) propose four key steps in constructing a socio-economic status (SES) index. The first is the selection of asset variables to be included in the index; the second is application of PCA (MCA in this case) to extract the first principal component (or dimension); the third is interpretation of results and creating the new variable using the weights from the first principal component; and finally, the fourth step is classifying household into socio-economic groups. These steps were applied to the Togo survey data set in order to construct a proxy variable for household wealth.

### Step 1: Selection of asset variables

The Togo survey collected a variety of information related to the household’s socioeconomic status, including ownership of durable assets, housing characteristics and access to sanitation facilities and source of water. Most of these variables are consistent with the wealth index developed by the World Bank for the Togo Demographic and Health Survey (DHS) 1998. See Table 1 below for a list of the potential asset variables and their distribution in the November 2011 dataset.

Determining the best combination of variables to include in the index:

1. Compare factor scores of different variable groups (e.g. durable assets, housing characteristics, water/sanitation access, agricultural variables)
2. Look at the distribution of household index scores using different variable groups to assess level of clumping and truncation

For several of the housing material and water/sanitation variables, similar responses were combined to create a smaller list of variables to be entered into the model.

Exploration of using different groups of variables in the model showed that the maximal variation explained by the first dimension and best distribution of scores across the continuum was achieved by including only the major assets owned (excluded fridge, landline, stove, fan, gas lamp, car & tractor, due to very low frequency of ownership); not including land or animal ownership (inclusion of these variables in the model, either together or separately, did not strengthen the index but rather weakened it); including the number of persons per room as a 3-level categorical variable and including the water and sanitation variables as 3-level categorical variables.

Step 2: Use MCA to assign loading to each variable and calculate asset index score.

MCA was applied to the data set using Stata **mca** command.

mca radio tv cellphone watch generator bike motorcycle electricity cookcharcoal latrinecat watercat  
floorcement wallcement roofmetal personroom3

The first dimension explained 76.4% of the variation. Factor scores for each variable included in the index are shown in **Table 1**.

Overall index scores were calculated (**predict** rowscores) for each household. As expected, this variable had a mean of 0 and standard deviation of 1. Figure 1 presents a histogram of these results.

Step 3: Divide households into wealth index categories, based on scores.

All individuals usually present in each household were assigned the household's standardized wealth index score, and all individuals in the sample population were ranked according to that score. The sample population was then divided into quintiles of individuals, with all individuals in a single household being assigned to the same quintile.

Step 4: Assess evidence for "internal coherence"

In order to determine whether the resulting index was performing according to expectations, several tests for internal coherence were conducted. The proportion for each asset variable was compared across the ranking levels, in order to determine if ownership of assets increased with wealth index ranking. See Table 2 for these results.

Limitations of the wealth index

The main limitation of the wealth index is how well it approximates current household wealth. One critique has suggested that this type of index can be interpreted not only as a measure of wealth but also of "involvement in the modern cash economy as opposed to the traditional sector" (Bingenheimer, 2007, p.83). Given the high positive weighting given to ownership of durable assets and absence of more traditional forms of wealth such as livestock or agricultural land, there is a tendency for the index to rate rural farming households as less wealthy.

*The wealth index was equivalized (adjusted for household size); however, most of the variables included are shared by all household members and so this may or may not be optimal (Rutstein and Johnson, 2004).*

The set of core assets for which data was collected in these surveys was based on standard survey protocol. No exploration was made of what specific indicators would best predict socio-economic position in this specific context. Therefore, the degree to which these assets are predictive of wealth may vary between settings and over time (Howe et al., 2008).

Following Table 1 are the results for each of the three rounds of data, November 2011 (**Table 2**), January 2012 (**Table 3**) and May 2012 (**Table 4**).

**Table 1: Variables collected in the surveys, with results presented from November 2011**

| Asset variable                                          |                                       | N    | Mean (SD)   |
|---------------------------------------------------------|---------------------------------------|------|-------------|
| <b>Ownership of household goods</b>                     |                                       |      |             |
| Has radio                                               |                                       | 720  | 50.46       |
| Has television                                          |                                       | 121  | 8.48        |
| Has refrigerator                                        |                                       | 6    | 0.42        |
| Has cellphone                                           |                                       | 570  | 39.94       |
| Has landline phone                                      |                                       | 19   | 1.33        |
| Has stove                                               |                                       | 6    | 0.42        |
| Has fan                                                 |                                       | 43   | 3.01        |
| Has watch                                               |                                       | 568  | 39.80       |
| Has generator                                           |                                       | 54   | 3.78        |
| Has gas lamp                                            |                                       | 18   | 1.26        |
| Has bicycle                                             |                                       | 176  | 12.33       |
| Has motorcycle                                          |                                       | 218  | 15.28       |
| Has car                                                 |                                       | 7    | 0.49        |
| Has tractor                                             |                                       | 3    | 0.21        |
| <b>Dwelling unit construction &amp; characteristics</b> |                                       |      |             |
| No. of members per sleeping room , mean (SEM)           |                                       | 1427 | 2.70 (0.04) |
| Floor material                                          | <i>Carreaux, granite</i>              | 4    | 0.28        |
|                                                         | <i>Moquette, gerflex</i>              | 9    | 0.63        |
|                                                         | <i>Cement</i>                         | 876  | 61.39       |
|                                                         | <i>Earthen</i>                        | 537  | 37.63       |
|                                                         | <i>Wood</i>                           | 1    | 0.07        |
| Wall material                                           | <i>Motte de terre, banco</i>          | 1116 | 78.21       |
|                                                         | <i>Bamboo/wood</i>                    | 1    | 0.07        |
|                                                         | <i>Brick/pierre</i>                   | 88   | 6.17        |
|                                                         | <i>Parpaing de ciment</i>             | 144  | 10.09       |
|                                                         | <i>Semi-dur, banco recouvert</i>      | 78   | 5.47        |
| Roof material                                           | <i>Dalle</i>                          | 17   | 1.19        |
|                                                         | <i>Corrugated metal</i>               | 1178 | 82.55       |
|                                                         | <i>Tile</i>                           | 9    | 0.63        |
|                                                         | <i>Terre</i>                          | 11   | 0.77        |
|                                                         | <i>Straw</i>                          | 212  | 14.86       |
| Cooking fuel source                                     | <i>Gas</i>                            | 6    | 0.42        |
|                                                         | <i>Charcoal</i>                       | 153  | 10.72       |
|                                                         | <i>Wood</i>                           | 1268 | 88.86       |
| <b>Access to services and resources</b>                 |                                       |      |             |
| Has electricity                                         |                                       | 160  | 11.21       |
| Drinking water source                                   | <i>Piped/tap water</i>                | 258  | 18.08       |
|                                                         | <i>Borehole/well</i>                  | 220  | 15.42       |
|                                                         | <i>Springwater</i>                    | 289  | 20.25       |
|                                                         | <i>Rainwater</i>                      | 3    | 0.21        |
|                                                         | <i>Charrette avec citerne</i>         | 1    | 0.07        |
|                                                         | <i>Surface water (river)</i>          | 655  | 45.90       |
|                                                         | <i>Mineral water (bottled/sachet)</i> | 1    | 0.07        |
| Sanitation facilities                                   | <i>Flush toilet</i>                   | 39   | 2.73        |
|                                                         | <i>Latrine</i>                        | 698  | 48.91       |
|                                                         | <i>Suspended latrine/toilet</i>       | 2    | 0.14        |
|                                                         | <i>Field/bush</i>                     | 636  | 44.57       |
|                                                         | <i>Other</i>                          | 52   | 3.64        |
| Owns agricultural land                                  |                                       | 851  | 59.64       |
| Owns animals                                            |                                       | 1068 | 74.84       |

**Table 2: Frequencies and factor scores for variables included in wealth index in November 2011**

| Asset variable                                          | Value                                           | Nov 2011 |       |              | Wealth quintile |            |            |            |            |  |
|---------------------------------------------------------|-------------------------------------------------|----------|-------|--------------|-----------------|------------|------------|------------|------------|--|
|                                                         |                                                 | N        | %     | Factor score | 1-highest       | 2          | 3          | 4          | 5-lowest   |  |
|                                                         |                                                 |          |       |              | 269 (18.9)      | 297 (20.8) | 274 (19.2) | 304 (21.3) | 283 (19.8) |  |
| <b>Ownership of household goods</b>                     |                                                 |          |       |              |                 |            |            |            |            |  |
| <b>Radio</b>                                            | No                                              | 707      | 49.54 | 0.861        |                 |            |            |            |            |  |
|                                                         | Yes                                             | 720      | 50.46 | -0.846       | 78.07           | 65.99      | 51.82      | 33.55      | 24.73      |  |
| <b>Television</b>                                       | No                                              | 1306     | 91.52 | 0.454        |                 |            |            |            |            |  |
|                                                         | Yes                                             | 121      | 8.48  | -4.903       | 43.87           | 0.67       | 0.36       | 0          | 0          |  |
| <b>Cellular phone</b>                                   | No                                              | 857      | 60.06 | 1.070        |                 |            |            |            |            |  |
|                                                         | Yes                                             | 570      | 39.94 | -1.609       | 88.48           | 61.28      | 35.77      | 15.79      | 1.41       |  |
| <b>Watch</b>                                            | No                                              | 859      | 60.20 | 0.819        |                 |            |            |            |            |  |
|                                                         | Yes                                             | 568      | 39.80 | -1.238       | 71.75           | 56.90      | 39.05      | 21.05      | 12.37      |  |
| <b>Generator</b>                                        | No                                              | 1373     | 96.22 | 0.130        |                 |            |            |            |            |  |
|                                                         | Yes                                             | 54       | 3.78  | -3.312       | 15.99           | 3.03       | 0.36       | 0.33       | 0          |  |
| <b>Bicycle</b>                                          | No                                              | 1251     | 87.67 | 0.089        |                 |            |            |            |            |  |
|                                                         | Yes                                             | 176      | 12.33 | -0.635       | 18.59           | 14.81      | 12.04      | 10.53      | 6.01       |  |
| <b>Motorcycle</b>                                       | No                                              | 1209     | 84.72 | 0.404        |                 |            |            |            |            |  |
|                                                         | Yes                                             | 218      | 15.28 | -2.239       | 42.38           | 18.52      | 10.95      | 4.93       | 1.41       |  |
| <b>Dwelling unit construction &amp; characteristics</b> |                                                 |          |       |              |                 |            |            |            |            |  |
| <b>Floor material</b>                                   | dirt/wood                                       | 538      | 37.70 | 1.394        |                 |            |            |            |            |  |
|                                                         | cement                                          | 889      | 62.30 | -0.843       | 92.94           | 85.19      | 70.44      | 56.91      | 7.07       |  |
| <b>Wall material</b>                                    | Mud brick                                       | 1117     | 78.28 | 0.610        |                 |            |            |            |            |  |
|                                                         | cement                                          | 310      | 21.72 | -2.197       | 59.85           | 33.00      | 14.96      | 2.96       | 0.35       |  |
| <b>Roof material</b>                                    | straw                                           | 223      | 15.63 | 1.719        |                 |            |            |            |            |  |
|                                                         | aluminium                                       | 1204     | 84.37 | -0.318       | 97.77           | 94.95      | 91.24      | 85.20      | 53.00      |  |
| <b>Cooking fuel source</b>                              | Wood                                            | 1268     | 88.86 | 0.316        |                 |            |            |            |            |  |
|                                                         | charcoal/gas                                    | 159      | 11.14 | -2.520       | 33.09           | 12.46      | 7.30       | 3.62       | 0.71       |  |
| <b>No. of members per sleeping room</b>                 | 0.5 to 1.5 members                              | 328      | 22.99 | -0.326       | 26.77           | 25.59      | 25.55      | 19.74      | 17.67      |  |
|                                                         | 1.6 to 4.0 members                              | 917      | 64.26 | -0.025       | 66.54           | 64.65      | 63.50      | 65.79      | 60.78      |  |
|                                                         | >4.0 members                                    | 182      | 12.75 | 0.711        | 6.69            | 9.76       | 10.96      | 14.47      | 21.55      |  |
| <b>Access to services and resources</b>                 |                                                 |          |       |              |                 |            |            |            |            |  |
| <b>Has electricity</b>                                  | No                                              | 1267     | 88.79 | 0.512        |                 |            |            |            |            |  |
|                                                         | Yes                                             | 160      | 11.21 | -4.052       | 53.16           | 4.71       | 1.09       | 0          | 0          |  |
| <b>Drinking water source</b>                            | piped/tap water                                 | 259      | 18.15 | -1.712       | 44.24           | 22.56      | 11.31      | 9.21       | 4.95       |  |
|                                                         | borehole/protected well                         | 184      | 12.89 | -1.059       | 21.56           | 18.52      | 11.31      | 7.57       | 6.01       |  |
|                                                         | surface water (river, canal, rain, springwater) | 984      | 68.96 | 0.649        | 34.20           | 58.92      | 77.37      | 83.22      | 89.05      |  |
| <b>Sanitation facilities</b>                            | flush toilet                                    | 39       | 2.73  | -1.472       | 5.20            | 4.38       | 2.19       | 1.64       | 0.35       |  |
|                                                         | covered/improved latrine                        | 229      | 16.05 | -2.082       | 44.98           | 17.85      | 13.50      | 4.28       | 1.77       |  |
|                                                         | bush/field/open latrine/other                   | 1159     | 81.22 | 0.461        | 49.81           | 77.78      | 84.31      | 94.08      | 97.88      |  |

**Table 3: Frequencies and factor scores for variables included in wealth index in January 2012 (N=1468)**

| Asset variable                                          | Value                                  | Jan 2012 |      |              | Wealth quintile |            |            |            |            |  |
|---------------------------------------------------------|----------------------------------------|----------|------|--------------|-----------------|------------|------------|------------|------------|--|
|                                                         |                                        | N        | %    | Factor score | 1-highest       | 2          | 3          | 4          | 5-lowest   |  |
|                                                         |                                        |          |      |              | 294 (20.0)      | 294 (20.0) | 295 (20.1) | 292 (19.9) | 293 (20.0) |  |
| <b>Ownership of household goods</b>                     |                                        |          |      |              |                 |            |            |            |            |  |
| <b>Radio</b>                                            | No                                     | 681      | 46.4 | 0.912        |                 |            |            |            |            |  |
|                                                         | Yes                                    | 787      | 53.6 | -0.789       | 76.9            | 72.1       | 52.5       | 38.0       | 28.3       |  |
| <b>Television</b>                                       | No                                     | 1323     | 90.1 | 0.446        |                 |            |            |            |            |  |
|                                                         | Yes                                    | 145      | 9.9  | -4.071       | 41.5            | 6.5        | 1.0        | 0.3        | 0          |  |
| <b>Cellular phone</b>                                   | No                                     | 827      | 56.3 | 1.064        |                 |            |            |            |            |  |
|                                                         | Yes                                    | 641      | 43.7 | -1.373       | 83.7            | 63.6       | 39.3       | 23.0       | 8.5        |  |
| <b>Watch</b>                                            | No                                     | 881      | 60.0 | 0.873        |                 |            |            |            |            |  |
|                                                         | Yes                                    | 587      | 40.0 | -1.310       | 73.8            | 57.5       | 38.3       | 18.8       | 11.3       |  |
| <b>Generator</b>                                        | No                                     | 1397     | 95.2 | 0.168        |                 |            |            |            |            |  |
|                                                         | Yes                                    | 71       | 4.8  | -3.308       | 20.4            | 2.7        | 1.0        | 0          | 0          |  |
| <b>Bicycle</b>                                          | No                                     | 1315     | 89.6 | 0.125        |                 |            |            |            |            |  |
|                                                         | Yes                                    | 153      | 10.4 | -1.071       | 16.7            | 16.0       | 12.2       | 4.1        | 3.1        |  |
| <b>Motorcycle</b>                                       | No                                     | 1268     | 86.4 | 0.323        |                 |            |            |            |            |  |
|                                                         | Yes                                    | 200      | 13.6 | -2.046       | 34.7            | 17.7       | 9.8        | 4.1        | 1.7        |  |
| <b>Dwelling unit construction &amp; characteristics</b> |                                        |          |      |              |                 |            |            |            |            |  |
| <b>Floor material</b>                                   | dirt/wood                              | 513      | 35.0 | 1.650        |                 |            |            |            |            |  |
|                                                         | cement                                 | 955      | 65.0 | -0.886       | 96.9            | 88.4       | 73.6       | 58.9       | 7.2        |  |
| <b>Wall material</b>                                    | Mud brick                              | 1140     | 77.7 | 0.553        |                 |            |            |            |            |  |
|                                                         | cement                                 | 328      | 22.3 | -1.923       | 54.4            | 29.9       | 21.0       | 4.8        | 1.4        |  |
| <b>Roof material</b>                                    | straw                                  | 273      | 18.6 | 1.918        |                 |            |            |            |            |  |
|                                                         | aluminium                              | 1195     | 81.4 | -0.438       | 98.6            | 96.6       | 88.5       | 79.5       | 43.7       |  |
| <b>Cooking fuel source</b>                              | Wood                                   | 1351     | 92.0 | 0.294        |                 |            |            |            |            |  |
|                                                         | charcoal/gas                           | 117      | 8.0  | -3.391       | 29.3            | 6.8        | 2.7        | 0.7        | 0.3        |  |
| <b>No. of members per sleeping room</b>                 | 0.1 to 1.5 members                     | 361      | 24.6 | -0.253       | 28.9            | 26.9       | 27.5       | 20.9       | 18.8       |  |
|                                                         | 1.6 to 4.0 members                     | 951      | 64.8 | -0.028       | 66.0            | 62.2       | 64.8       | 70.2       | 60.8       |  |
|                                                         | >4.0 members                           | 156      | 10.6 | 0.755        | 5.1             | 10.9       | 7.8        | 8.9        | 20.5       |  |
| <b>Access to services and resources</b>                 |                                        |          |      |              |                 |            |            |            |            |  |
| <b>Has electricity</b>                                  | No                                     | 1310     | 89.2 | 0.465        |                 |            |            |            |            |  |
|                                                         | Yes                                    | 158      | 10.8 | -3.854       | 45.6            | 6.5        | 1.0        | 0.7        | 0          |  |
| <b>Drinking water source</b>                            | piped/tap water                        | 188      | 12.8 | -2.457       | 38.1            | 12.2       | 9.5        | 2.7        | 1.4        |  |
|                                                         | borehole/protected well                | 269      | 18.3 | -1.262       | 33.3            | 32.3       | 11.2       | 11.3       | 3.4        |  |
|                                                         | surface water(river,canal,rain spring) | 1011     | 68.9 | 0.793        | 28.6            | 55.4       | 79.3       | 86.0       | 95.2       |  |
| <b>Sanitation facilities</b>                            | flush toilet                           | 17       | 1.2  | -3.230       | 4.8             | 0.7        | 0.3        | 0          | 0          |  |
|                                                         | covered/improved latrine               | 316      | 21.5 | -1.461       | 42.5            | 28.2       | 20.7       | 10.3       | 5.8        |  |
|                                                         | open latrine <sup>s</sup>              | 422      | 28.8 | 0.155        | 22.8            | 32.7       | 28.1       | 31.2       | 29.0       |  |
|                                                         | bush/field/other                       | 713      | 48.6 | 0.633        | 29.9            | 38.4       | 50.9       | 58.6       | 65.2       |  |

**Table 4: Frequencies and factor scores for variables included in wealth index in June 2012 (N=1555)**

| Asset variable                                          | Value                                     | May 2012 |       |              | Wealth quintile         |                 |                 |                 |                        |  |
|---------------------------------------------------------|-------------------------------------------|----------|-------|--------------|-------------------------|-----------------|-----------------|-----------------|------------------------|--|
|                                                         |                                           | N        | %     | Factor score | 1-highest<br>311 (20.0) | 2<br>311 (20.0) | 3<br>312 (20.1) | 4<br>311 (20.0) | 5-lowest<br>310 (19.9) |  |
| <b>Ownership of household goods</b>                     |                                           |          |       |              |                         |                 |                 |                 |                        |  |
| <b>Radio</b>                                            | No                                        | 758      | 48.75 | 1.022        |                         |                 |                 |                 |                        |  |
|                                                         | Yes                                       | 797      | 51.25 | -0.972       | 81.99                   | 72.99           | 54.81           | 31.51           | 14.84                  |  |
| <b>Television</b>                                       | No                                        | 1387     | 89.20 | 0.561        |                         |                 |                 |                 |                        |  |
|                                                         | Yes                                       | 168      | 10.80 | -4.633       | 53.05                   | 0.96            | 0.00            | 0.00            | 0.00                   |  |
| <b>Cellular phone</b>                                   | No                                        | 846      | 54.41 | 1.127        |                         |                 |                 |                 |                        |  |
|                                                         | Yes                                       | 709      | 45.59 | -1.345       | 89.39                   | 69.77           | 42.31           | 19.94           | 6.45                   |  |
| <b>Watch</b>                                            | No                                        | 902      | 58.01 | 0.859        |                         |                 |                 |                 |                        |  |
|                                                         | Yes                                       | 653      | 41.99 | -1.187       | 77.81                   | 57.88           | 41.67           | 23.47           | 9.03                   |  |
| <b>Generator</b>                                        | No                                        | 1473     | 94.73 | 0.193        |                         |                 |                 |                 |                        |  |
|                                                         | Yes                                       | 82       | 5.27  | -3.464       | 21.86                   | 2.89            | 1.28            | 0.32            | 0.00                   |  |
| <b>Bicycle</b>                                          | No                                        | 1388     | 89.26 | 0.147        |                         |                 |                 |                 |                        |  |
|                                                         | Yes                                       | 167      | 10.74 | -1.225       | 21.22                   | 15.43           | 8.97            | 5.79            | 2.26                   |  |
| <b>Motorcycle</b>                                       | No                                        | 1313     | 84.44 | 0.439        |                         |                 |                 |                 |                        |  |
|                                                         | Yes                                       | 242      | 15.56 | -2.280       | 44.05                   | 19.29           | 8.97            | 4.82            | 0.65                   |  |
| <b>Dwelling unit construction &amp; characteristics</b> |                                           |          |       |              |                         |                 |                 |                 |                        |  |
| <b>Floor material</b>                                   | dirt/wood                                 | 469      | 30.16 | 1.501        |                         |                 |                 |                 |                        |  |
|                                                         | cement                                    | 1086     | 69.84 | -0.648       | 95.82                   | 87.78           | 77.56           | 63.99           | 23.87                  |  |
| <b>Wall material</b>                                    | Mud brick                                 | 1127     | 72.48 | 0.563        |                         |                 |                 |                 |                        |  |
|                                                         | cement                                    | 428      | 27.52 | -1.481       | 58.84                   | 36.66           | 22.44           | 17.68           | 1.94                   |  |
| <b>Roof material</b>                                    | straw                                     | 220      | 14.15 | 1.717        |                         |                 |                 |                 |                        |  |
|                                                         | aluminium                                 | 1335     | 85.85 | -0.283       | 98.71                   | 95.50           | 89.42           | 83.60           | 61.94                  |  |
| <b>Cooking fuel source</b>                              | Wood                                      | 1460     | 93.89 | 0.269        |                         |                 |                 |                 |                        |  |
|                                                         | charcoal/gas                              | 95       | 6.11  | -4.138       | 26.37                   | 3.22            | 0.32            | 0.64            | 0.00                   |  |
| <b>No. of members per sleeping room</b>                 | 0.1 to 1.5 members                        | 379      | 24.37 | -0.122       | 25.72                   | 25.72           | 24.04           | 25.08           | 21.29                  |  |
|                                                         | 1.6 to 4.0 members                        | 1000     | 64.31 | -0.129       | 67.85                   | 68.81           | 64.42           | 63.34           | 57.10                  |  |
|                                                         | >4.0 members                              | 176      | 11.32 | 0.994        | 6.43                    | 5.47            | 11.54           | 11.58           | 21.61                  |  |
| <b>Access to services and resources</b>                 |                                           |          |       |              |                         |                 |                 |                 |                        |  |
| <b>Has electricity</b>                                  | No                                        | 1387     | 89.20 | 0.459        |                         |                 |                 |                 |                        |  |
|                                                         | Yes                                       | 168      | 10.80 | -3.787       | 43.73                   | 8.36            | 1.28            | 0.64            | 0.00                   |  |
| <b>Drinking water source</b>                            | pipewell                                  | 148      | 9.52  | -1.863       | 21.86                   | 9.32            | 8.97            | 5.47            | 1.94                   |  |
|                                                         | borehole/protected well                   | 385      | 24.76 | -0.848       | 41.16                   | 33.12           | 26.92           | 14.79           | 7.74                   |  |
|                                                         | surface water (river, canal, rain spring) | 1022     | 65.72 | 0.589        | 36.98                   | 57.56           | 64.10           | 79.94           | 90.32                  |  |
| <b>Sanitation facilities</b>                            | flush toilet                              | 19       | 1.22  | -5.692       | 5.79                    | 0.32            | 0.00            | 0.00            | 0.00                   |  |
|                                                         | covered/improved latrine                  | 269      | 17.30 | -1.517       | 38.91                   | 21.86           | 15.06           | 9.32            | 1.29                   |  |
|                                                         | open latrine <sup>§</sup>                 | 490      | 31.51 | 0.116        | 26.37                   | 34.08           | 33.97           | 39.87           | 23.23                  |  |
|                                                         | bush/field/other                          | 777      | 49.97 | 0.591        | 28.94                   | 43.73           | 50.96           | 50.80           | 75.48                  |  |

Results for the analysis of access and ITN use by household wealth, as determined by quintile membership. A socioeconomic score was allocated to each household using a multiple correspondence analysis of household assets. Households were divided into five equal groups (quintiles) according to their level of wealth, and by definition approximately 20% were in each quintile. Quintile 1 represented the richest households and quintile 5 the poorest households. Each access and use indicator was assessed by socioeconomic quintile using PROC surveyfreq and PROC surveylogistic in SAS to determine if any indicators varied significantly as a function of wealth. P values are for test of differences (using Rao-Scott chi-square goodness-of-fit tests) in indicator among all five wealth quartiles (overall) and tests of contrast between poorest quartiles (Q4&5) vs richest quartiles (Q1&2) when the overall test was significant.

|                                      | <b>% individuals with access to at least 0.5 ITN</b> | <b>% individuals who slept under an ITN the previous night</b> | <b>% children under five who slept under an ITN the previous night</b> |
|--------------------------------------|------------------------------------------------------|----------------------------------------------------------------|------------------------------------------------------------------------|
| <b>November</b>                      |                                                      |                                                                |                                                                        |
| <b>P-value: overall</b>              | 0.04                                                 | 0.01                                                           | 0.79                                                                   |
| <b>P-value: Q4&amp;5 vs Q1&amp;2</b> | 83.6% vs 86.4%<br>(p=0.04)                           | 74.4% vs 67.6%<br>(p=0.003)                                    |                                                                        |
| <b>January</b>                       |                                                      |                                                                |                                                                        |
| <b>P-value: overall</b>              | 0.14                                                 | 0.40                                                           | 0.45                                                                   |
| <b>P-value: Q4&amp;5 vs Q1&amp;2</b> |                                                      |                                                                |                                                                        |
| <b>June</b>                          |                                                      |                                                                |                                                                        |
| <b>P-value: overall</b>              | 0.39                                                 | 0.37                                                           | 0.79                                                                   |
| <b>P-value: Q4&amp;5 vs Q1&amp;2</b> |                                                      |                                                                |                                                                        |

#### References

- Bingenheimer, J. B. (2007). Wealth, wealth indices and HIV risk in East Africa. *Int Fam Plan Perspect* 33(2): 83-4.
- Booyesen, F., S. Van Der Berg, et al. (2008). Using an asset index to assess trends in poverty in seven sub-Saharan African countries. *World Development* 36(6): 1113-1130.
- Filmer, D. and L. H. Pritchett (2001). Estimating wealth effects without expenditure data--or tears: an application to educational enrollments in states of India. *Demography* 38(1): 115-32.
- Houweling, T. A., A. E. Kunst, et al. (2003). Measuring health inequality among children in developing countries: does the choice of the indicator of economic status matter? *Int J Equity Health* 2(1): 8.
- Howe, L. D., J. R. Hargreaves, et al. (2008). Issues in the construction of wealth indices for the measurement of socio-economic position in low-income countries. *Emerg Themes Epidemiol* 5: 3.
- Rutstein, S. O. and K. Johnson (2004). The DHS Wealth Index. Calverton, Maryland, ORC Macro.
- Vyas, S. and L. Kumaranayake (2006). Constructing socio-economic status indices: how to use principal components analysis. *Health Policy Plan* 21(6): 459-68.
