# Supplementary material for: Effectiveness of post-campaign, door-to-door, hang-up, and communication interventions to increase long-lasting, insecticidal bed net utilization in Togo (2011–2012): a cluster randomized, control trial
Source: PubMed Central journal article supplement (PMC4110632; doi:10.1186/1475-2875-13-260), 2014-07-09
Supplement: 1475-2875-13-260-S2.pdf [file 1475-2875-13-260-S2.pdf]

Additional file 2: Hang-up and Door-to-Door visit monitoring results from the study area cantons as reported by volunteers

| <b>Indicator</b>                           | HU            | First DTD     | Second DTD  |
|--------------------------------------------|---------------|---------------|-------------|
| Number of communities (cantons)            | 212 (20)      | 101 (10)      | 54 (5)      |
| Number of households visited (% of total)  | 34,758 (89.4) | 16,573 (88.7) | 8094 (90.3) |
| % of households that received key messages | 99.5          | 99.2          | 100.0       |
| % of nets already hanging in household     | 57.5          | 91.9          | 96.0        |
| % of nets hung by volunteer                | 33.6          | 1.3           | 0.8         |
| % of nets hanging following the HU visit   | 91.2          | 93.3          | 96.8        |
