# Supplementary material for: Effectiveness of post-campaign, door-to-door, hang-up, and communication interventions to increase long-lasting, insecticidal bed net utilization in Togo (2011–2012): a cluster randomized, control trial
Source: PubMed Central journal article supplement (PMC4110632; doi:10.1186/1475-2875-13-260), 2014-07-09
Supplement: 1475-2875-13-260-S3.pdf [file 1475-2875-13-260-S3.pdf]

Additional file 3: Reasons for non-use by household access.

Reasons cited for why a person did not use a net the previous night by study arm (unweighted) for households with sufficient access to ITNs (at least 1 ITN per 2 people) and without for the second and third evaluations (January and June 2012).

| Reason given by respondent | Survey | Insufficient access |              |            |            |       | Sufficient access |              |            |            |       |
|----------------------------|--------|---------------------|--------------|------------|------------|-------|-------------------|--------------|------------|------------|-------|
|                            |        | Control             | Study arm HU | HU + 1 DTD | HU + 2 DTD | Total | Control           | Study arm HU | HU + 1 DTD | HU + 2 DTD | Total |
| N                          | Jan    | 86                  | 129          | 103        |            | 232   | 196               | 105          | 103        |            | 208   |
|                            | June   | 153                 | 182          | 66         | 54         | 455   | 168               | 183          | 64         | 56         | 471   |
| Not enough nets - %        | Jan    | 52.3                | 52.7         | 64.1       |            | 56.3  | 5.6               | 21           | 20.4       |            | 13.4  |
|                            | June   | 53.6                | 52.7         | 45.5       | 66.7       | 53.6  | 19                | 21.3         | 20.3       | 17.9       | 20    |
| Too hot - %                | Jan    | 5.8                 | 7.8          | 9.7        |            | 7.9   | 13.3              | 9.5          | 14.6       |            | 12.6  |
|                            | June   | 2.6                 | 4.4          | 4.5        | 7.4        | 4.2   | 8.3               | 9.8          | 29.7       | 17.9       | 13    |
| No mosquitoes - %          | Jan    | 4.7                 | 3.9          | 0          |            | 2.8   | 11.7              | 15.2         | 7.8        |            | 11.6  |
|                            | June   | 3.9                 | 4.4          | 10.6       | 1.9        | 4.8   | 4.8               | 2.2          | 0          | 0          | 2.5   |
| Negative experience - %    | Jan    | 4.7                 | 5.4          | 12.6       |            | 7.5   | 9.7               | 6.7          | 16.5       |            | 10.6  |
|                            | June   | 2                   | 2.2          | 3          | 3.7        | 2.4   | 6.5               | 3.8          | 9.4        | 3.6        | 5.5   |
| Other - %                  | Jan    | 32.6                | 30.2         | 13.6       |            | 25.5  | 58.7              | 46.7         | 37.9       |            | 50.2  |
|                            | June   | 35.3                | 35.7         | 36.4       | 16.7       | 33.4  | 56                | 61.2         | 32.8       | 53.6       | 54.6  |
| Don't know - %             | Jan    | 0                   | 0            | 0          |            | 0     | 1                 | 1            | 2.9        |            | 1.5   |
|                            | June   | 2.6                 | 0.5          | 0          | 3.7        | 1.5   | 5.4               | 1.6          | 7.8        | 7.1        | 4.5   |
